# Supplementary material for: In Utero Exposure to Chikungunya and Child Morbimortality: A Population-Based Longitudinal Study
Source: Research Square preprint supplement (doi:10.21203/rs.3.rs-7716245/v1), 2025-10-06
Supplement: Supplementary file 1 [file fdfd63064e5facb429a78461.pdf]

# Supplementary Materials

## In Utero Exposure to Chikungunya and Child Morbimortality: A Population-Based Longitudinal Study

### Authors:

Mio Kushibuchi, MD, MSc<sup>1</sup>; Orlagh Carroll, PhD<sup>2</sup>; Thiago Cerqueira-Silva, MD, PhD<sup>2,4</sup>; Viviane S. Boaventura, MD, PhD<sup>3,4</sup>; Maria Glória Teixeira, M.D, PhD<sup>5</sup>; Mauricio L Barreto, MD, PhD<sup>1</sup>; and Enny S Paixão, PhD<sup>2</sup>

1 Centre for Data and Knowledge Integration for Health (CIDACS), Fundação Oswaldo Cruz, Salvador, Brazil;

2 Faculty of Epidemiology and Population Health, London School of Hygiene and Tropical Medicine, London, UK;

3 Faculty of Medicine of Bahia, Universidade Federal da Bahia, Salvador, Brazil.

4 The Gonçalo Moniz Institute (IGM), Fundação Oswaldo Cruz, Salvador, Brazil.

5 Institute of Collective Health (ISC), Federal University of Bahia, Brazil

## Table of contents

Supplementary material 1: The details of each dataset and variables obtained from the dataset, as well as the information on the linkage 4

*Material 1.1: Databases used in the analysis, obtained from the cohort profile 4*

*Material 1.3: Details on the linkage accuracy 6*

Supplementary material 2: The distribution of missing variables among observations with at least one variable missing, and those with complete variables. 7

Supplemental material 4: STROBE statement checklist 8

Supplementary material 4: The characteristics of the matched and the non-matched controls. 12

Supplementary material 5: The number of events overall and in each stratum. 14

Supplementary material 6: The number of neonatal events in each stratum. 14

Supplementary material 7: HR of the Cox regressions and their 95% CI obtained by bootstrapping. 15

Supplementary material 8: Standardized marginal risk and absolute risk difference per 1000 population for each exposure group, and their 95% confidence interval (CI) obtained by bootstrapping. 15

Supplementary material 9: Proportional hazards assumption test by Schoenfeld residuals. 16

Supplementary material 10: HR of the Cox regressions of neonatal outcomes and their 95% CI obtained by bootstrapping. 17

Supplementary material 11: The ICD-10 codes and classes for the causes of the first-time hospitalizations. 17

Supplementary material 12: The number of observations and events in each sensitivity analyses. 18

Supplementary material 13: The HR for the Cox regression of the sensitivity analyses. 18

Supplementary Figure 1: DAG model of covariates. 19

Supplementary Figure 2: The distribution of causes of the first-time hospitalization by CHIKF exposure status. 20

Reference 20



## Supplementary material 1: The details of each dataset and variables obtained from the dataset, as well as the information on the linkage

### Material 1.1: Databases used in the analysis, obtained from the cohort profile

Information cited from the cohort profile described in detail in Paixão 2024(1)

| Database                                                                                               | Description                                                                                                                                                                                                                                                           | Variable used                                                                                                                                                                                                                                                                                                                                                                                                        | Sensitivity                                         |
|--------------------------------------------------------------------------------------------------------|-----------------------------------------------------------------------------------------------------------------------------------------------------------------------------------------------------------------------------------------------------------------------|----------------------------------------------------------------------------------------------------------------------------------------------------------------------------------------------------------------------------------------------------------------------------------------------------------------------------------------------------------------------------------------------------------------------|-----------------------------------------------------|
| SINASC (Sistema de Informação sobre Nascidos Vivos/ Information System of Live Birth)                  | SINASC is the birth registry of Brazil, completed by a health professional who was present at the delivery                                                                                                                                                            | Information about the mother (age, educational attainment, marital status, and race/ethnicity), the pregnancy (the length of gestation, the number of previous gestations, whether the pregnancy was a singleton, and the number of antenatal care visits), and the newborn (birth date, sex, the municipality of residence, birth weight, gestational age at birth, and the APGAR score at 1 minute and 5 minutes). | Records information of 97% of Brazilian live births |
| CadUnico (Cadastro único para Programas Sociais/ Unified System for Social Programs)                   | CadUnico is an integrated system in which all households and individuals receiving any social programs, including the conditional cash transfer program Bolsa Familia, are registered. It contains socioeconomic information about these families.                    | Whether the mother of the newborn is registered in the CadUnico, and the urbanicity of the residence.                                                                                                                                                                                                                                                                                                                | More than 50% of the Brazilian population           |
| SINAN (Sistema de Informação sobre Agravos de Notificação/ Information System for Notifiable Diseases) | SINAN contains all the registered cases of specific infectious diseases including Chikungunya, Dengue and Zika. The health professional who diagnosed these infections in the local health center registers all cases in this system. The system is disease specific. | Date of symptom onset, date of registry, and the diagnosis (either clinical or lab-confirmed) of the CHIKV, DENV and ZIKV infection                                                                                                                                                                                                                                                                                  | Depends on the disease                              |
| SIM (Sistema de Informação sobre Mortalidade/ Information System of Mortality)                         | SIM uses the death certificate, a legal document that records all deaths.                                                                                                                                                                                             | Date of death                                                                                                                                                                                                                                                                                                                                                                                                        | Varies by place, range 70–95% of Brazilian deaths   |

|                                                                               |                                                                                                                                                                                                                                                                                      |                                                                   |                                              |
|-------------------------------------------------------------------------------|--------------------------------------------------------------------------------------------------------------------------------------------------------------------------------------------------------------------------------------------------------------------------------------|-------------------------------------------------------------------|----------------------------------------------|
| SIH (Sistema de Informações Hospitalares/ Hospitalization Information System) | SIH is the register for all hospital admissions in the public hospital, under the national health system (Sistema Único de Saude). Admissions in private hospitals are not included, but it is probable that the poorer population registered in CadUnico uses the public hospitals. | Date of hospitalization and the cause (ICD-10) of hospitalization | Around 70% of all hospitalizations in Brazil |
|-------------------------------------------------------------------------------|--------------------------------------------------------------------------------------------------------------------------------------------------------------------------------------------------------------------------------------------------------------------------------------|-------------------------------------------------------------------|----------------------------------------------|

## Material 1.2: Details on the exclusion criteria

| Criteria                                                                                    | Numbers | Reason                                                                                                                                                                                                                                         |
|---------------------------------------------------------------------------------------------|---------|------------------------------------------------------------------------------------------------------------------------------------------------------------------------------------------------------------------------------------------------|
| Births with mismatched birth dates between SINASC and SIH                                   | 21064   | Remove data with inconsistencies in the chronology of events, which has a high probability of linkage error                                                                                                                                    |
| Does not have an RGI                                                                        | 235     | The RGI was used for matching; thus, the information was needed for selecting the cohort.                                                                                                                                                      |
| Non-singleton births                                                                        | 123922  | Having multiple fetuses is a high risk of birth complications and neonatal morbidity, thus the outcome may be caused by this rather than the infection.                                                                                        |
| Births with inconsistent dates (date for hospitalization or death before the date of birth) | 119     | Remove data with inconsistencies in the chronology of events, which has a high probability of linkage error                                                                                                                                    |
| Births with missing gestational age at birth                                                | 130969  | Gestational age information is needed to define the timing of exposure.                                                                                                                                                                        |
| Births from mothers younger than 14.9 years or older than 49.9 Years                        | 56657   | The reproductive age defined by the WHO is 15 to 49 years. There is high possibility that the extreme values were errors in the data record, and if the value is true, the young (or old) maternal age is associated with birth complications. |
| Births with weights of below 500g or above 6000g                                            | 7040    | There is high possibility of error in data record, and even if the value is true, that the newborn was hospitalized or died due to the underlying condition that caused a low birth weight.                                                    |
| Births with gestational ages below 20 weeks or above 45 weeks                               | 479     | There is high possibility of error in data record, and even if the value is true, that the newborn was hospitalized or died due to prematurity rather than the infection                                                                       |

|                                                                                                                       |       |                                                                                                                                                                                                                                                                        |
|-----------------------------------------------------------------------------------------------------------------------|-------|------------------------------------------------------------------------------------------------------------------------------------------------------------------------------------------------------------------------------------------------------------------------|
| Births exposed to in-utero DENV or ZIKV                                                                               | 41136 | The outcome of event (hospitalization or death) may have been associated with the exposure to other Arboviruses, especially given that ZIKV is known to cause congenital Zika syndrome                                                                                 |
| Births with inconsistent CHIKV infection status (more than 2 infection registries which were more than 30 days apart) | 11    | It was uncertain whether both registries were of the same episode, and there was high possibility that at least one of the registries was a misclassification. Furthermore, we were not sure which of the multiple registries was the actual date the symptom started. |
| Births with CHIKV symptom onset before January 1st 2015                                                               | 19    | Although there were some CHIKV cases reported in specific regions during 2014, the disease diagnosis protocol had not been well established before the outbreak in 2015, thus there was a high possibility of misclassification.                                       |

### Material 1.3: Details on the linkage accuracy

A detailed information is available in Ali 2019(2) and Paixao 2024(1). In summary, record linkage was performed using CIDACS-RL, a validated tool developed for large-scale Brazilian administrative data. This approach combines deterministic and probabilistic matching techniques, utilizing key identifiers including name, mother's name, date of birth, sex, and municipality of residence. Prior to linkage, datasets underwent rigorous preprocessing, including standardization of names and dates, imputation of missing values, and removal of duplicates.

The CIDACS-RL algorithm uses Apache Lucene for indexing and blocking to reduce computational demands, followed by a hybrid matching approach. Categorical variables were matched deterministically, while names and dates were compared probabilistically using similarity functions like the Dice coefficient. The linkage process was conducted within the secure data infrastructure of CIDACS, adhering to strict data security protocols and ethical governance. CIDACS-RL has been previously validated with >90% sensitivity and specificity.

**Supplementary material 2: The distribution of missing variables among observations with at least one variable missing, and those with complete variables.**

|                                 | Observations with missing covariates |                        |                    | Observations without missing covariates |                          |                      |
|---------------------------------|--------------------------------------|------------------------|--------------------|-----------------------------------------|--------------------------|----------------------|
|                                 | N                                    | Overall<br>N = 751,085 | Exposed<br>N = 793 | N                                       | Overall<br>N = 4,662,527 | Exposed<br>N = 3,154 |
| <b>Gestation weeks at birth</b> | 751,085                              | 39 (38, 40)            | 39 (38, 40)        | 4,662,527                               | 39 (38, 40)              | 39 (38, 40)          |
| <b>Gestation week category</b>  | 751,085                              |                        |                    | 4,662,527                               |                          |                      |
| 19wks and below                 |                                      | 0 (0%)                 | 0 (0%)             |                                         | 0 (0%)                   | 0 (0%)               |
| 20-27wks                        |                                      | 4,237 (0.6%)           | 3 (0.4%)           |                                         | 18,507 (0.4%)            | 14 (0.4%)            |
| 28-31wks                        |                                      | 8,201 (1.1%)           | 11 (1.4%)          |                                         | 41,833 (0.9%)            | 26 (0.8%)            |
| 32-36wks                        |                                      | 69,154 (9.2%)          | 72 (9.1%)          |                                         | 415,906 (8.9%)           | 254 (8.1%)           |
| 37-46wks                        |                                      | 669,493 (89%)          | 707 (89%)          |                                         | 4,186,281 (90%)          | 2,860 (91%)          |
| 47wks or more                   |                                      | 0 (0%)                 | 0 (0%)             |                                         | 0 (0%)                   | 0 (0%)               |
| <b>Maternal education level</b> | 675,334                              |                        |                    | 4,662,527                               |                          |                      |
| none                            |                                      | 8,342 (1.2%)           | 9 (1.3%)           |                                         | 22,494 (0.5%)            | 17 (0.5%)            |
| 1-3 years                       |                                      | 30,505 (4.5%)          | 19 (2.7%)          |                                         | 131,061 (2.8%)           | 118 (3.7%)           |
| 4-7 years                       |                                      | 152,755 (23%)          | 148 (21%)          |                                         | 999,980 (21%)            | 693 (22%)            |
| 8-11 years                      |                                      | 420,391 (62%)          | 472 (67%)          |                                         | 3,146,550 (67%)          | 2,103 (67%)          |
| 12 or more years                |                                      | 63,341 (9.4%)          | 55 (7.8%)          |                                         | 362,442 (7.8%)           | 223 (7.1%)           |
| Unknown                         |                                      | 75,751                 | 90                 |                                         | 0                        | 0                    |
| <b>Maternal race</b>            | 515,332                              |                        |                    | 4,662,527                               |                          |                      |
| Asian                           |                                      | 1,446 (0.3%)           | 0 (0%)             |                                         | 13,386 (0.3%)            | 8 (0.3%)             |
| Black                           |                                      | 31,177 (6.0%)          | 8 (1.7%)           |                                         | 298,369 (6.4%)           | 112 (3.6%)           |
| Indigenous                      |                                      | 7,623 (1.5%)           | 1 (0.2%)           |                                         | 47,999 (1.0%)            | 9 (0.3%)             |
| Pardo                           |                                      | 368,633 (72%)          | 412 (87%)          |                                         | 2,988,021 (64%)          | 2,693 (85%)          |
| White                           |                                      | 106,453 (21%)          | 50 (11%)           |                                         | 1,314,752 (28%)          | 332 (11%)            |
| Unknown                         |                                      | 235,753                | 322                |                                         | 0                        | 0                    |
| <b>Maternal age</b>             | 751,078                              | 25 (20, 29)            | 25 (21, 30)        | 4,662,524                               | 24 (20, 30)              | 25 (21, 31)          |
| Unknown                         |                                      | 7                      | 0                  |                                         | 0                        | 0                    |
| <b>Maternal age category</b>    | 751,078                              |                        |                    | 4,662,523                               |                          |                      |
| 15 to 19                        |                                      | 150,004 (20%)          | 145 (18%)          |                                         | 964,666 (21%)            | 587 (19%)            |
| 20 to 34                        |                                      | 526,473 (70%)          | 549 (69%)          |                                         | 3,225,663 (69%)          | 2,227 (71%)          |
| 35 to 49                        |                                      | 74,601 (9.9%)          | 99 (12%)           |                                         | 472,194 (10%)            | 340 (11%)            |
| Unknown                         |                                      | 7                      | 0                  |                                         | 0                        | 0                    |

|                                        |               |               |           |                 |               |           |
|----------------------------------------|---------------|---------------|-----------|-----------------|---------------|-----------|
| <b>Number of antenatal care visits</b> | 595,900       |               |           | 4,662,527       |               |           |
| adequate                               | 521,486 (80%) | 641 (87%)     |           | 3,653,685 (78%) | 2,611 (83%)   |           |
| one less                               | 53,319 (8.1%) | 45 (6.1%)     |           | 392,693 (8.4%)  | 251 (8.0%)    |           |
| 2+ less                                | 81,076 (12%)  | 50 (6.8%)     |           | 616,149 (13%)   | 292 (9.3%)    |           |
| Unknown                                | 155,185       | 84            |           | 0               | 0             |           |
| <b>Number of gestations</b>            | 468,126       |               |           | 4,662,527       |               |           |
| No parity                              | 140,980 (30%) | 143 (29%)     |           | 1,629,840 (35%) | 1,088 (34%)   |           |
| 1-2 parity                             | 240,283 (51%) | 268 (54%)     |           | 2,240,895 (48%) | 1,496 (47%)   |           |
| 3 or more parities                     | 86,863 (19%)  | 84 (17%)      |           | 791,792 (17%)   | 570 (18%)     |           |
| Unknown                                | 282,959       | 298           |           | 0               | 0             |           |
| <b>Urbanicity of residence</b>         | 592,379       |               |           | 4,662,527       |               |           |
| Rural                                  | 172,614 (29%) | 135 (20%)     |           | 1,042,541 (22%) | 651 (21%)     |           |
| Urban                                  | 419,765 (71%) | 531 (80%)     |           | 3,619,986 (78%) | 2,503 (79%)   |           |
| Unknown                                | 158,706       | 127           |           | 0               | 0             |           |
| <b>All-cause hospitalization</b>       | 751,085       | 148,760 (20%) | 221 (28%) | 4,662,527       | 901,171 (19%) | 686 (22%) |
| <b>All-cause death</b>                 | 751,085       | 9,760 (1.3%)  | 13 (1.6%) | 4,662,527       | 48,352 (1.0%) | 38 (1.2%) |

## Supplemental material 4: STROBE statement checklist

|                      | Item No | Recommendation                                                                                                                                                                                                     |
|----------------------|---------|--------------------------------------------------------------------------------------------------------------------------------------------------------------------------------------------------------------------|
| Title and abstract   | 1       | (a)The study design, longitudinal study, is stated in the title                                                                                                                                                    |
|                      |         | (b) The methods section of the abstract summarizes what we did, and the results section summarizes what was found.                                                                                                 |
| Introduction         |         |                                                                                                                                                                                                                    |
| Background/rationale | 2       | The scientific background and rationale for the investigation is explained in the second and third paragraph of the introduction                                                                                   |
| Objectives           | 3       | The objectives of ths study is stated in the last paragraph of the introduction                                                                                                                                    |
| Methods              |         |                                                                                                                                                                                                                    |
| Study design         | 4       | The key elements of the study design (a matched cohort study following children from birth until hospitalization, death, age 3, or Dec 31, 2018) are described at the beginning of the Methods, under Study design |



|                              |    |                                                                                                                                                                                                                                                                                                                                                                                                                                                                                                                                                               |
|------------------------------|----|---------------------------------------------------------------------------------------------------------------------------------------------------------------------------------------------------------------------------------------------------------------------------------------------------------------------------------------------------------------------------------------------------------------------------------------------------------------------------------------------------------------------------------------------------------------|
| Setting                      | 5  | The study setting, population, and time frame are described under Study design and Study population. Children were born between Jan 1, 2015 and Dec 31, 2018 in Brazil. Data were obtained from linked administrative databases (CIDACS Birth Cohort, CADU, SINASC, SINAN, SIH, SIM). Follow-up extended to Dec 31, 2018, with periods of exposure and outcomes clearly defined.                                                                                                                                                                              |
| Participants                 | 6  | <p>(a) Eligibility criteria, sources, and selection are described under Study population. Exclusions included non-singletons, implausible dates, missing gestational age, implausible birthweight, and exposure to ZIKV or DENV. Participants were followed until hospitalization, death, age 3, or end of 2018.</p> <p>(b) Matching criteria are given under Statistical analysis: each exposed newborn was matched to 10 unexposed by month of conception and Immediate Geographic Region (RGI). Final numbers were 3,154 exposed and 31,540 unexposed.</p> |
| Variables                    | 7  | Definitions of exposures, outcomes, predictors, confounders, and effect modifiers are described in Exposures, Outcome, and Covariates. Exposures: maternal CHIKF infection during pregnancy, stratified by trimester and intrapartum. Outcomes: first hospitalization and all-cause death by age 3. Covariates included maternal education, race/skin colour, age, adequacy of antenatal care, previous gestations, and urbanicity.                                                                                                                           |
| Data sources/<br>measurement | 8  | Sources of data and methods of assessment are detailed under Data source. Maternal and child data came from SINASC, social information from CADU, exposures from SINAN, hospitalizations from SIH, and deaths from SIM. Assessment methods were consistent across exposed and unexposed groups because they rely on the same national surveillance systems.                                                                                                                                                                                                   |
| Bias                         | 9  | Efforts to reduce bias are described in Statistical analysis and Limitations. Matching by conception month and RGI reduced temporal and geographic confounding. Excluding records with implausible or inconsistent data minimized misclassification. Sensitivity analyses (lab-confirmed cases, alternative exposure definitions, restriction to term/normal weight births) addressed possible misclassification and residual confounding                                                                                                                     |
| Study size                   | 10 | Study size was determined by including all eligible live births in the CIDACS Birth Cohort between 2015 and 2018 after applying exclusion criteria. No formal sample size calculation was performed.                                                                                                                                                                                                                                                                                                                                                          |
| Quantitative variables       | 11 | Quantitative variables were categorized where appropriate (e.g., maternal age into 3 groups, gestational age into term/preterm, education into categories). Some categories were collapsed (e.g., maternal education none/1–3 years, race white/non-white) to ensure sufficient statistical power                                                                                                                                                                                                                                                             |
| Statistical methods          | 12 | (a) Statistical methods are described under Statistical analysis: stratified Cox proportional hazards models adjusted for confounders estimated HRs, with marginal standardized risk differences. Kaplan–Meier curves described survival. Bootstrapping was used for confidence intervals.                                                                                                                                                                                                                                                                    |

(b) Subgroup analyses included trimester-specific and intrapartum exposures; interactions were assessed by categorizing exposure timing.

(c) Missing data were minimal (<6%); a complete case analysis was performed.

(d) All hospitalizations and deaths are registered in the national registry, thus there were no loss to follow-up

(e) Four sensitivity analyses were conducted: restriction to term/normal weight births, restriction to lab-confirmed cases, extended exposure window to two days post-birth, and alternative matching criteria (4:1 matching).

## Results

|                  |     |                                                                                                                                                                                                                                                                                                                            |
|------------------|-----|----------------------------------------------------------------------------------------------------------------------------------------------------------------------------------------------------------------------------------------------------------------------------------------------------------------------------|
| Participants     | 13* | (a) Numbers of individuals at each stage are reported in Results, Study population and baseline characteristics and shown in Figure 1. From 5,795,265 live births, exclusions were applied, leaving 3,154 exposed and 31,540 matched unexposed.                                                                            |
|                  |     | (b) Reasons for non-participation (exclusions: non-singletons, implausible dates, implausible birthweight, missing gestational age, other arbovirus exposures, inconsistent CHIKF records) are described in Study population (Methods).                                                                                    |
|                  |     | (c) A flow diagram of inclusion/exclusion is provided in Figure 1.                                                                                                                                                                                                                                                         |
| Descriptive data | 14* | (a) Characteristics of study participants (demographics, maternal and pregnancy variables, covariates) are shown in Table 1 and Supplementary Table 4.                                                                                                                                                                     |
|                  |     | (b) Numbers of missing data for each variable are given in Supplementary Table 2.                                                                                                                                                                                                                                          |
|                  |     | (c) Follow-up time is summarized in Results: median follow-up for hospitalization was 19.1 months [IQR: 27.9], and for death was 25.8 months [IQR: 23.2].                                                                                                                                                                  |
| Outcome data     | 15* | Numbers of outcome events are reported in Results. Hospitalizations: 687 (21%) in exposed and 5,705 (18%) in unexposed. Deaths: 38 (1.2%) in exposed and 342 (1.1%) in unexposed. Further details by cause are shown in Supplementary Tables 5–11 and Figures 2–4.                                                         |
| Main results     | 16  | (a) The crude hazards are described as Kaplan Meier curves. Confounder-adjusted hazard ratios and risk differences with 95% CIs are reported in Results, All-cause first hospitalization and All-cause death, adjusted for maternal education, race/skin colour, age, antenatal care, previous gestations, and urbanicity. |
|                  |     | (b) Category boundaries are defined in Covariates (e.g., maternal age 15–19, 20–34, 35–49; education collapsed into categories; race white vs non-white).                                                                                                                                                                  |
|                  |     | (c) Absolute risks and standardized risk differences per 1000 children are presented in Results, All-cause hospitalization (e.g., 39.4 additional hospitalizations per 1000 exposed).                                                                                                                                      |
| Other analyses   | 17  | Analyses of subgroups (by trimester, intrapartum, neonatal outcomes) and sensitivity analyses (term/normal weight births, lab-confirmed cases, extended exposure window, alternative matching) are described in Results, Sensitivity analyses and Methods, Statistical analysis.                                           |

## Discussion

|                          |    |                                                                                                                                                                                                                                                |
|--------------------------|----|------------------------------------------------------------------------------------------------------------------------------------------------------------------------------------------------------------------------------------------------|
| Key results              | 18 | Key results are summarized in the first paragraph of Discussion: a 22% higher hazard of hospitalization and possible increased risk of death, especially with intrapartum and early-trimester exposures.                                       |
| Limitations              | 19 | Limitations are discussed in Discussion, including live birth bias, passive surveillance and misclassification, missing data, lack of confounders (income, living conditions), under-ascertainment, and reduced power in sensitivity analyses. |
| Interpretation           | 20 | Interpretation is provided throughout Discussion, linking findings to previous literature, hypothesized biological mechanisms, and public health implications, while acknowledging uncertainty and imprecision of mortality estimates.         |
| Generalisability         | 21 | Generalisability is discussed in Discussion: findings are relevant to Brazil and globally, given the expansion of endemic areas to Europe with climate change and globalization.                                                               |
| <b>Other information</b> |    |                                                                                                                                                                                                                                                |
| Funding                  | 22 | Funding sources (Wellcome Trust, Royal Society) are reported in the Abstract and under Funding at the end of the manuscript.                                                                                                                   |

## Supplementary material 4: The characteristics of the matched and the non-matched controls.

|                                 | N      | Overall<br>N = 34,694 | Matched        |                | Not matched     |
|---------------------------------|--------|-----------------------|----------------|----------------|-----------------|
|                                 |        |                       | Non-exposed    | Exposed        | Non-exposed     |
|                                 |        |                       | N = 31,540     | N = 3,154      | N = 4,627,833   |
| <b>Sex</b>                      | 34,688 |                       |                |                |                 |
| Female                          |        | 16,864 (49%)          | 15,342 (49%)   | 1,522 (48%)    | 2,256,217 (49%) |
| Male                            |        | 17,824 (51%)          | 16,193 (51%)   | 1,631 (52%)    | 2,370,911 (51%) |
| Unknown                         |        | 6                     | 5              | 1              | 705             |
| <b>Birth weight</b>             | 34,692 | 3,265                 | 3,265          | 3,270          | 3,235           |
|                                 |        | (2,950, 3,580)        | (2,950, 3,580) | (2,955, 3,590) | (2,930, 3,545)  |
| Unknown                         |        | 2                     | 2              | 0              | 1,300           |
| <b>Birth weight category</b>    | 34,692 |                       |                |                |                 |
| 500g and below                  |        | 0 (0%)                | 0 (0%)         | 0 (0%)         | 0 (0%)          |
| 501-1000g                       |        | 138 (0.4%)            | 127 (0.4%)     | 11 (0.3%)      | 17,461 (0.4%)   |
| 1001-1500g                      |        | 196 (0.6%)            | 179 (0.6%)     | 17 (0.5%)      | 27,613 (0.6%)   |
| 1501-2500g                      |        | 2,047 (5.9%)          | 1,849 (5.9%)   | 198 (6.3%)     | 296,358 (6.4%)  |
| 2501-4000g                      |        | 30,177 (87%)          | 27,463 (87%)   | 2,714 (86%)    | 4,040,790 (87%) |
| 4001-6000g                      |        | 2,134 (6.2%)          | 1,920 (6.1%)   | 214 (6.8%)     | 244,311 (5.3%)  |
| 6001g and above                 |        | 0 (0%)                | 0 (0%)         | 0 (0%)         | 0 (0%)          |
| Unknown                         |        | 2                     | 2              | 0              | 1,300           |
| <b>Gestation weeks at birth</b> | 34,694 | 39 (38, 40)           | 39 (38, 40)    | 39 (38, 40)    | 39 (38, 40)     |
| <b>Gestation week category</b>  | 34,694 |                       |                |                |                 |
| 19wks and below                 |        | 0 (0%)                | 0 (0%)         | 0 (0%)         | 0 (0%)          |
| 20-27wks                        |        | 161 (0.5%)            | 147 (0.5%)     | 14 (0.4%)      | 18,346 (0.4%)   |
| 28-31wks                        |        | 318 (0.9%)            | 292 (0.9%)     | 26 (0.8%)      | 41,515 (0.9%)   |
| 32-36wks                        |        | 3,141 (9.1%)          | 2,887 (9.2%)   | 254 (8.1%)     | 412,765 (8.9%)  |
| 37-46wks                        |        | 31,074 (90%)          | 28,214 (89%)   | 2,860 (91%)    | 4,155,207 (90%) |
| 47wks or more                   |        | 0 (0%)                | 0 (0%)         | 0 (0%)         | 0 (0%)          |
| <b>Maternal marital status</b>  | 34,466 |                       |                |                |                 |
| divorced                        |        | 226 (0.7%)            | 201 (0.6%)     | 25 (0.8%)      | 48,371 (1.1%)   |
| married                         |        | 7,508 (22%)           | 6,883 (22%)    | 625 (20%)      | 1,004,107 (22%) |
| single                          |        | 16,180 (47%)          | 14,684 (47%)   | 1,496 (48%)    | 2,318,767 (50%) |
| union                           |        | 10,484 (30%)          | 9,507 (30%)    | 977 (31%)      | 1,224,609 (27%) |

|                                        |        |              |              |             |                 |
|----------------------------------------|--------|--------------|--------------|-------------|-----------------|
| widowed                                |        | 68 (0.2%)    | 59 (0.2%)    | 9 (0.3%)    | 7,302 (0.2%)    |
| Unknown                                |        | 228          | 206          | 22          | 24,677          |
| <b>apgar1</b>                          | 33,834 |              |              |             |                 |
| 3 or below                             |        | 410 (1.2%)   | 380 (1.2%)   | 30 (1.0%)   | 55,887 (1.2%)   |
| 4 to 6                                 |        | 1,469 (4.3%) | 1,320 (4.3%) | 149 (4.9%)  | 205,994 (4.6%)  |
| 7 or more                              |        | 31,955 (94%) | 29,064 (94%) | 2,891 (94%) | 4,257,282 (94%) |
| Unknown                                |        | 860          | 776          | 84          | 108,670         |
| <b>Maternal education level</b>        | 34,694 |              |              |             |                 |
| 1-3 years                              |        | 1,351 (3.9%) | 1,233 (3.9%) | 118 (3.7%)  | 129,710 (2.8%)  |
| 12 or more years                       |        | 2,575 (7.4%) | 2,352 (7.5%) | 223 (7.1%)  | 359,867 (7.8%)  |
| 4-7 years                              |        | 8,227 (24%)  | 7,534 (24%)  | 693 (22%)   | 991,753 (21%)   |
| 8-11 years                             |        | 22,310 (64%) | 20,207 (64%) | 2,103 (67%) | 3,124,240 (68%) |
| none                                   |        | 231 (0.7%)   | 214 (0.7%)   | 17 (0.5%)   | 22,263 (0.5%)   |
| <b>Maternal race</b>                   | 34,694 |              |              |             |                 |
| Asian                                  |        | 86 (0.2%)    | 78 (0.2%)    | 8 (0.3%)    | 13,300 (0.3%)   |
| Black                                  |        | 1,538 (4.4%) | 1,426 (4.5%) | 112 (3.6%)  | 296,831 (6.4%)  |
| Indigenous                             |        | 196 (0.6%)   | 187 (0.6%)   | 9 (0.3%)    | 47,803 (1.0%)   |
| Pardo                                  |        | 28,825 (83%) | 26,132 (83%) | 2,693 (85%) | 2,959,196 (64%) |
| White                                  |        | 4,049 (12%)  | 3,717 (12%)  | 332 (11%)   | 1,310,703 (28%) |
| <b>Maternal age</b>                    | 34,694 | 25 (20, 30)  | 24 (20, 30)  | 25 (21, 31) | 24 (20, 30)     |
| <b>Maternal age category</b>           | 34,694 |              |              |             |                 |
| 15 to 19                               |        | 7,073 (20%)  | 6,486 (21%)  | 587 (19%)   | 957,597 (21%)   |
| 20 to 34                               |        | 24,091 (69%) | 21,864 (69%) | 2,227 (71%) | 3,201,572 (69%) |
| 35 to 49                               |        | 3,530 (10%)  | 3,190 (10%)  | 340 (11%)   | 468,664 (10%)   |
| <b>Number of antenatal care visits</b> | 34,694 |              |              |             |                 |
| 0-3 times                              |        | 2,505 (7.2%) | 2,349 (7.4%) | 156 (4.9%)  | 366,114 (7.9%)  |
| 4-5 times                              |        | 5,341 (15%)  | 4,930 (16%)  | 411 (13%)   | 665,993 (14%)   |
| 6 or more times                        |        | 26,848 (77%) | 24,261 (77%) | 2,587 (82%) | 3,595,726 (78%) |
| <b>Number of previous gestations</b>   | 34,694 |              |              |             |                 |
| No parity                              |        | 12,126 (35%) | 11,038 (35%) | 1,088 (34%) | 1,617,714 (35%) |
| 1-2 parity                             |        | 16,942 (49%) | 15,446 (49%) | 1,496 (47%) | 2,223,953 (48%) |
| 3 or more parity                       |        | 5,626 (16%)  | 5,056 (16%)  | 570 (18%)   | 786,166 (17%)   |

|                                  |        |              |              |             |                 |
|----------------------------------|--------|--------------|--------------|-------------|-----------------|
| <b>Urbanicity of residence</b>   | 34,694 |              |              |             |                 |
| Rural                            |        | 9,808 (28%)  | 9,157 (29%)  | 651 (21%)   | 1,032,733 (22%) |
| Urban                            |        | 24,886 (72%) | 22,383 (71%) | 2,503 (79%) | 3,595,100 (78%) |
| <b>All-cause hospitalization</b> | 34,694 | 6,392 (18%)  | 5,705 (18%)  | 687 (22%)   | 894,866 (19%)   |
| <b>All-cause death</b>           | 34,694 | 380 (1.1%)   | 342 (1.1%)   | 38 (1.2%)   | 47,973 (1.0%)   |

### Supplementary material 5: The number of events overall and in each stratum.

|             | Total number | Admissions |            | Death  |            |
|-------------|--------------|------------|------------|--------|------------|
|             |              | Number     | Percentage | Number | Percentage |
| Overall     | 34694        | 6305       | 18.17%     | 379    | 1.09%      |
| Unexposed   | 31540        | 5619       | 17.82%     | 342    | 1.08%      |
| Exposed     | 3154         | 686        | 21.75%     | 38     | 1.2%       |
| First       | 888          | 281        | 31.64%     | 9      | 1.01%      |
| Second      | 1239         | 214        | 17.27%     | 18     | 1.45%      |
| Third       | 1027         | 215        | 20.93%     | 11     | 1.07%      |
| Antepartum  | 3040         | 649        | 21.35%     | 33     | 1.09%      |
| Intrapartum | 114          | 37         | 32.46%     | 5      | 4.39%      |

### Supplementary material 6: The number of neonatal events in each stratum.

|             | Total number | Admissions |            | Death  |            |
|-------------|--------------|------------|------------|--------|------------|
|             |              | Number     | Percentage | Number | Percentage |
| Overall     | 34694        | 3455       | 9.96%      | 233    | 0.67%      |
| Unexposed   | 31540        | 3099       | 9.83%      | 207    | 0.66%      |
| Exposed     | 3154         | 356        | 11.29%     | 26     | 0.82%      |
| First       | 888          | 102        | 11.49%     | 4      | 0.45%      |
| Second      | 1239         | 148        | 11.95%     | 14     | 1.13%      |
| Third       | 1027         | 106        | 10.32%     | 8      | 0.78%      |
| Antepartum  | 3040         | 333        | 10.95%     | 22     | 0.72%      |
| Intrapartum | 114          | 23         | 20.18%     | 4      | 3.51%      |

**Supplementary material 7: HR of the Cox regressions and their 95% CI obtained by bootstrapping.**

|           |                  | HR    | Bootstrapped 95% CI |
|-----------|------------------|-------|---------------------|
| Admission | Overall          | 1.212 | [1.109-1.324]       |
|           | First trimester  | 1.281 | [1.089-1.499]       |
|           | Second trimester | 1.277 | [1.142-1.469]       |
|           | Third trimester  | 1.085 | [0.942-1.259]       |
|           | Antepartum       | 1.188 | [1.093-1.29]        |
|           | Intrapartum      | 1.882 | [1.217-2.828]       |
|           | Overall          | 1.076 | [0.699-1.506]       |
| Death     | First trimester  | 0.851 | [0.352-1.668]       |
|           | Second trimester | 1.343 | [0.77-2.413]        |
|           | Third trimester  | 0.971 | [0.432-1.819]       |
|           | Antepartum       | 0.969 | [0.629-1.408]       |
|           | Intrapartum      | 3.914 | [1.031-12.398]      |

Abbreviations: 95% CI, 95 percent confidence interval

**Supplementary material 8: Standardized marginal risk and absolute risk difference per 1000 population for each exposure group, and their 95% confidence interval (CI) obtained by bootstrapping.**

| Risk difference per 1000 people |           |       |              | Risk difference per 1000 people |           |      |               |
|---------------------------------|-----------|-------|--------------|---------------------------------|-----------|------|---------------|
| 95% CI                          |           |       |              | 95% CI                          |           |      |               |
| Admission                       | 12 months | 25.77 | [4.27-74.7]  | Death                           | 12 months | 0.71 | [-7.58-25.72] |
|                                 | 24 months | 30.79 | [5.05-87.6]  |                                 | 24 months | 0.78 | [-7.72-25.92] |
|                                 | 36 months | 32.88 | [5.42-92.74] |                                 | 36 months | 0.79 | [-8.55-27.92] |

Abbreviations: 95% CI, 95 percent confidence interval

## Supplementary material 9: Proportional hazards assumption test by Schoenfeld residuals.

| Cox model                                                         | Exposure variable | p value | PH                  |
|-------------------------------------------------------------------|-------------------|---------|---------------------|
|                                                                   |                   |         | Assumption Violated |
| Main analysis for admissions                                      |                   |         |                     |
| Overall                                                           | chik              | 0.481   | No                  |
| Analyses by trimester                                             | trimester         | 0.65    | No                  |
| Analyses by intrapartum period                                    | intrapartum       | 0.459   | No                  |
| Main analysis for deaths                                          |                   |         |                     |
| Overall                                                           | chik              | 0.898   | No                  |
| Analyses by trimester                                             | trimester         | 0.915   | No                  |
| Analyses by intrapartum period                                    | intrapartum       | 0.889   | No                  |
| Sub-analyses of neonatal outcomes                                 |                   |         |                     |
| Admissions                                                        | chik              | 0.091   | No                  |
| Deaths                                                            | chik              | 0.122   | No                  |
| Sensitivity analyses for normal-weight and -term births           |                   |         |                     |
| Admissions                                                        | chik              | 0.301   | No                  |
| Deaths                                                            | chik              | 0.336   | No                  |
| Sensitivity analyses for lab-confirmed cases                      |                   |         |                     |
| Admissions                                                        | chik              | 0.033   | Yes                 |
| Deaths                                                            | chik              | 0.53    | No                  |
| Sensitivity analyses including exposures until 2 days after birth |                   |         |                     |
| Admissions, overall                                               | chik              | 0.517   | No                  |
| Admissions, intrapartum period                                    | intrapartum       | 0.143   | No                  |
| Death, overall                                                    | chik              | 0.822   | No                  |
| Death, intrapartum period                                         | intrapartum       | 0.22    | No                  |
| Sensitivity analyses for mont-year and municipality matching      |                   |         |                     |
| Admissions                                                        | chik              | 0.515   | No                  |
| Deaths                                                            | chik              | 0.08    | No                  |
| Sensitivity analyses for propensity score matching                |                   |         |                     |
| Admissions                                                        | chik              | 0.69    | No                  |
| Deaths                                                            | chik              | 0.226   | No                  |

Exposure variables chik was a binary variable of exposed and non-exposed; trimester was a four-level categorical variable of non-exposed, first trimester, second trimester and third trimester; intrapartum was a three-level categorical variable of non-exposed, antepartum and intrapartum.



**Supplementary material 10: HR of the Cox regressions of neonatal outcomes and their 95% CI obtained by bootstrapping.**

|                    | HR    | Bootstrapped 95% CI |
|--------------------|-------|---------------------|
| Neonatal Admission | 1.125 | [1.001-1.269]       |
| Neonatal Death     | 1.21  | [0.75-1.856]        |

Abbreviations: 95% CI, 95 percent confidence interval

**Supplementary material 11: The ICD-10 codes and classes for the causes of the first-time hospitalizations.**

| Letter(s)     | ICD Chapter Title                                                                       | Non exposed |       | Exposed |       |
|---------------|-----------------------------------------------------------------------------------------|-------------|-------|---------|-------|
|               |                                                                                         | N           | %     | N       | %     |
| A–B           | Certain infectious and parasitic diseases                                               | 901         | 16.2% | 120     | 17.8% |
| C–D (C00–D48) | Neoplasms                                                                               | 4           | 0.1%  | 0       | 0%    |
|               | Diseases of the blood and blood-forming organs                                          |             |       |         |       |
| D (D50–D89)   | and certain disorders involving the immune mechanism                                    | 36          | 0.6%  | 4       | 0.6%  |
| E             | Endocrine, nutritional and metabolic diseases                                           | 53          | 1%    | 6       | 0.9%  |
| F             | Mental and behavioural disorders                                                        | 0           | 0%    | 0       | 0%    |
| G             | Diseases of the nervous system                                                          | 67          | 1.2%  | 6       | 0.9%  |
| H00–H59       | Diseases of the eye and adnexa                                                          | 3           | 0.1%  | 0       | 0%    |
| H60–H95       | Diseases of the ear and mastoid process                                                 | 21          | 0.4%  | 3       | 0.4%  |
| I             | Diseases of the circulatory system                                                      | 16          | 0.3%  | 3       | 0.4%  |
| J             | Diseases of the respiratory system                                                      | 1265        | 22.7% | 146     | 21.6% |
| K             | Diseases of the digestive system                                                        | 131         | 2.4%  | 20      | 3%    |
| L             | Diseases of the skin and subcutaneous tissue                                            | 118         | 2.1%  | 16      | 2.4%  |
| M             | Diseases of the musculoskeletal system and connective tissue                            | 9           | 0.2%  | 2       | 0.3%  |
| N             | Diseases of the genitourinary system                                                    | 143         | 2.6%  | 21      | 3.1%  |
| O             | Pregnancy, childbirth and the puerperium                                                | 2           | 0%    | 0       | 0%    |
| P             | Certain conditions originating in the perinatal period                                  | 2506        | 45.1% | 294     | 43.5% |
| Q             | Congenital malformations, deformations and chromosomal abnormalities                    | 144         | 2.6%  | 20      | 3%    |
| R             | Symptoms, signs and abnormal clinical and laboratory findings, not elsewhere classified | 54          | 1%    | 5       | 0.7%  |

|     |                                                                        |    |      |    |      |
|-----|------------------------------------------------------------------------|----|------|----|------|
| S-T | Injury, poisoning and certain other consequences<br>of external causes | 88 | 1.6% | 10 | 1.5% |
| V-Y | External causes of morbidity and mortality                             | 0  | 0%   | 0  | 0%   |
| Z   | Factors influencing health status and contact<br>with health services  | 58 | 1%   | 10 | 1.5% |

## Supplementary material 12: The number of observations and events in each sensitivity analyses.

|                                                       | Total number | Admissions |            | Death  |            |
|-------------------------------------------------------|--------------|------------|------------|--------|------------|
|                                                       |              | Number     | Percentage | Number | Percentage |
| For normal-weight, normal-term births                 |              |            |            |        |            |
| Non-exposed                                           | 23858        | 3714       | 15.57%     | 131    | 0.55%      |
| Exposed                                               | 2756         | 519        | 18.83%     | 13     | 0.47%      |
| For laboratory-confirmed exposed cases                |              |            |            |        |            |
| Non-exposed                                           | 9430         | 1707       | 18.1%      | 89     | 0.94%      |
| Exposed                                               | 943          | 183        | 19.41%     | 11     | 1.17%      |
| Exposed cases for up to two days after delivery added |              |            |            |        |            |
| Non-exposed                                           | 31730        | 5748       | 18.12%     | 354    | 1.12%      |
| Exposed                                               | 3173         | 694        | 21.87%     | 39     | 1.23%      |

## Supplementary material 13: The HR for the Cox regression of the sensitivity analyses.

|                                                              | HR    | Bootstrapped<br>95% CI |
|--------------------------------------------------------------|-------|------------------------|
| <b>For normal-weight, normal-term births</b>                 |       |                        |
| Admission                                                    | 1.22  | [1.110-1.341]          |
| Death                                                        | 0.818 | [0.373-1.331]          |
| <b>For laboratory-confirmed exposed cases</b>                |       |                        |
| Admission                                                    | 1.139 | [0.976-1.341]          |
| Death                                                        | 1.356 | [0.574-2.385]          |
| <b>Exposed cases for up to two days after delivery added</b> |       |                        |
| Admission                                                    |       |                        |
| Overall                                                      | 1.217 | [1.117-1.318]          |
| Intrapartum                                                  | 2.073 | [1.505-2.723]          |
| Death                                                        |       |                        |

|                                         |       |               |
|-----------------------------------------|-------|---------------|
| Overall                                 | 1.124 | [0.789-1.514] |
| Intrapartum                             | 3.896 | [1.262-7.517] |
| <b>Alternative matching method used</b> |       |               |
| Admission                               | 1.191 | [1.092-1.3]   |
| Death                                   | 1.052 | [0.73-1.518]  |

Abbreviations: 95% CI, 95 percent confidence interval

**Supplementary Figure 1: DAG model of covariates.**

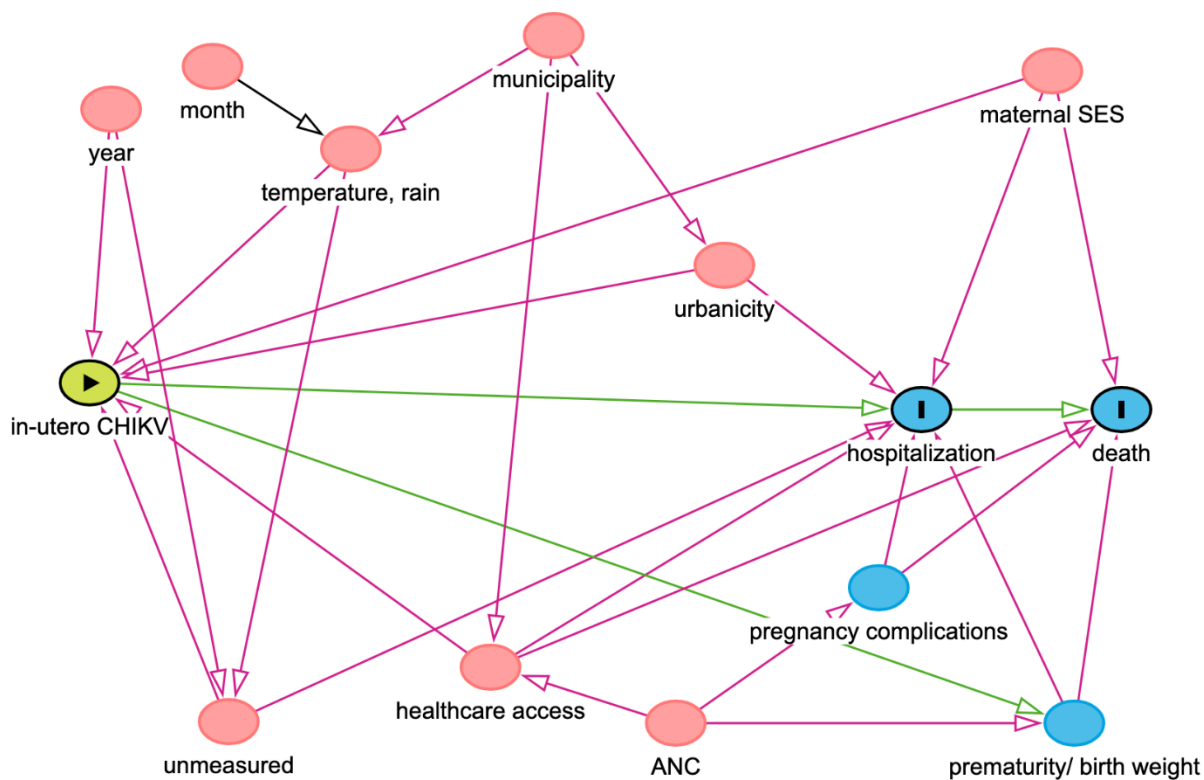

Abbreviations: ANC, antenatal care visits; CHIKV, chikungunya virus; SES, socioeconomic status

**Supplementary Figure 2: The distribution of causes of the first-time hospitalization by CHIKF exposure status.**

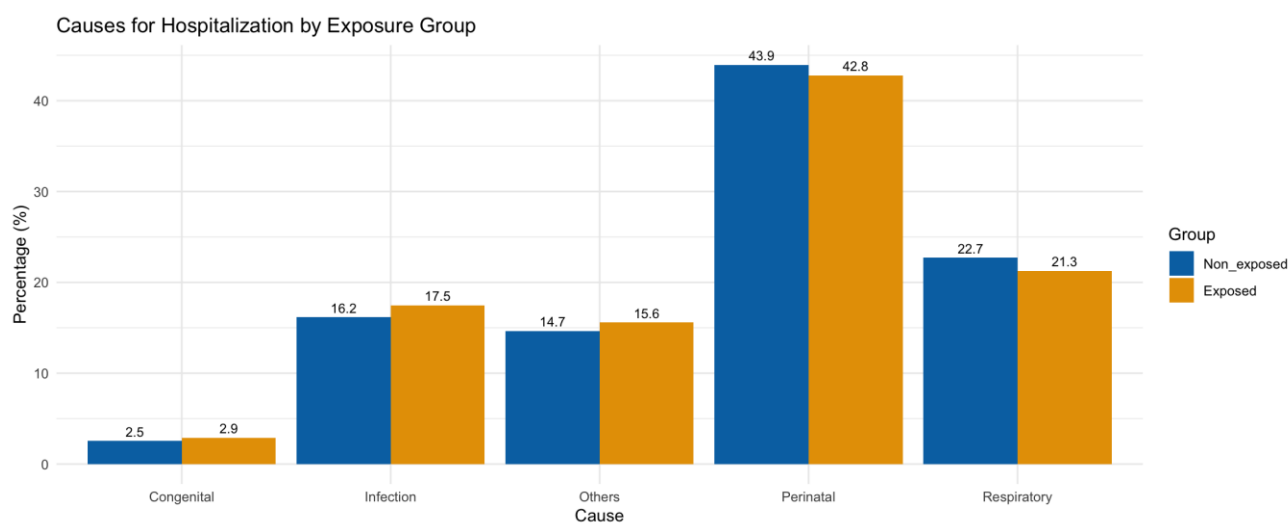

**Reference**

1. Paixao ES, Cerqueira-Silva T, Florentino PTV, Carroll O, Sanchez Clemente N, Lawlor DA, et al. A nationwide longitudinal investigation on the role of prenatal exposure to infectious diseases on the onset of chronic conditions in children and adolescents in Brazil. Wellcome Open Res. 2024 Oct 17;9:320.
2. Ali MS, Ichihara MY, Lopes LC, Barbosa GCG, Pita R, Carreiro RP, et al. Administrative data linkage in Brazil: Potentials for health technology assessment. Front Pharmacol. 2019 Sept 23;10:984.
